# Supplementary figures and images for: Horizontal Distribution Characteristics and Environmental Factors of Shrubland Species Diversity in Hainan Island, China
Source: MDPI journal article supplement (doi:10.3390/land11071047), 2022-07-11

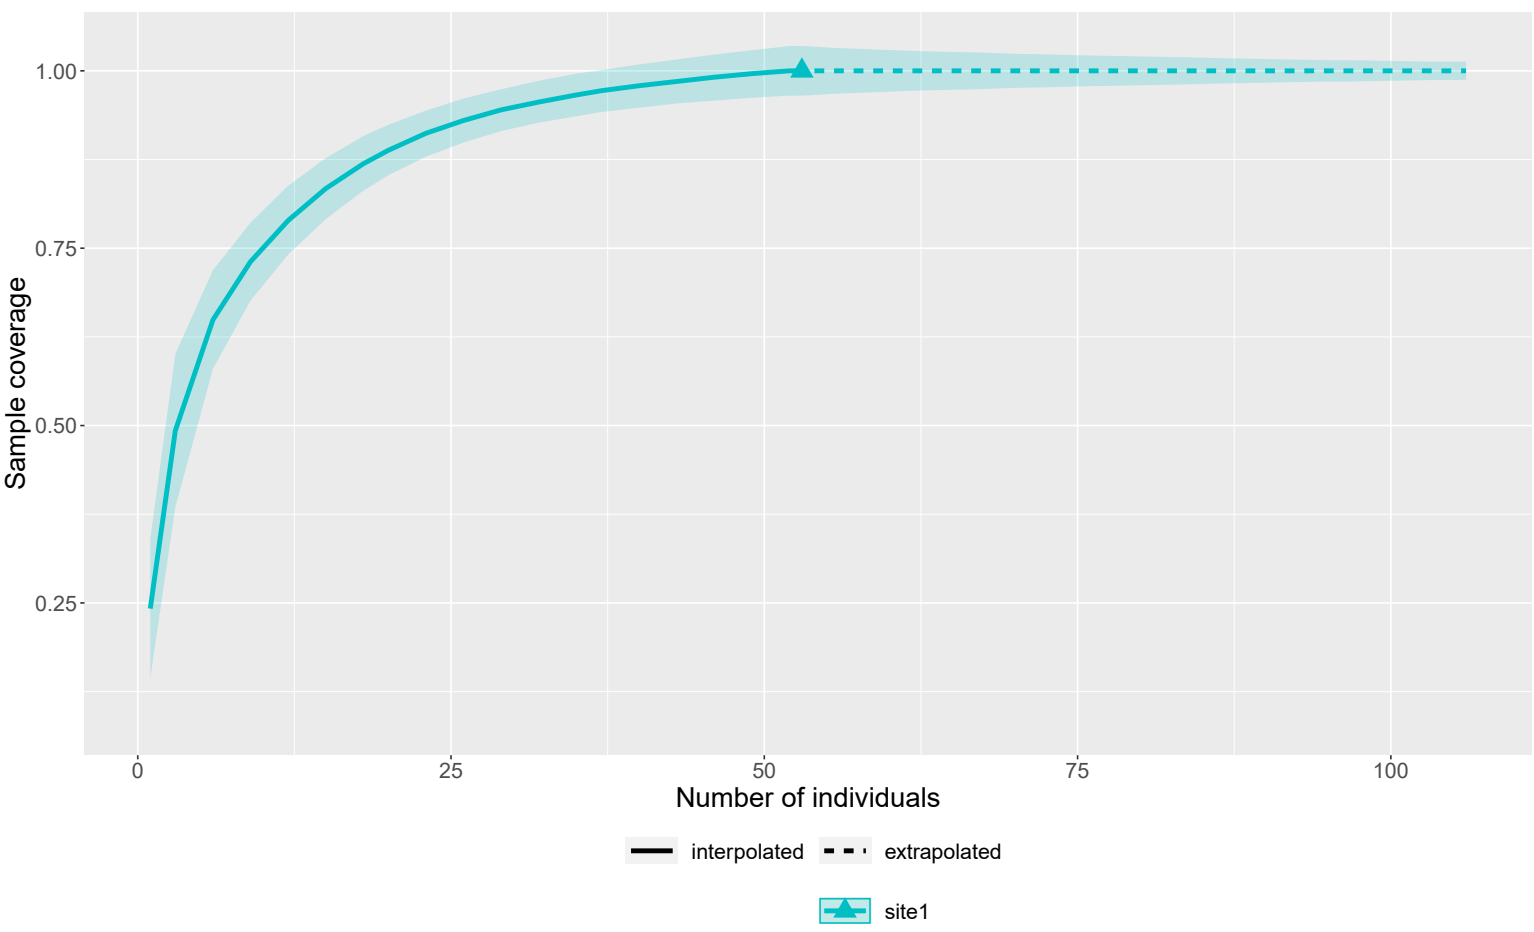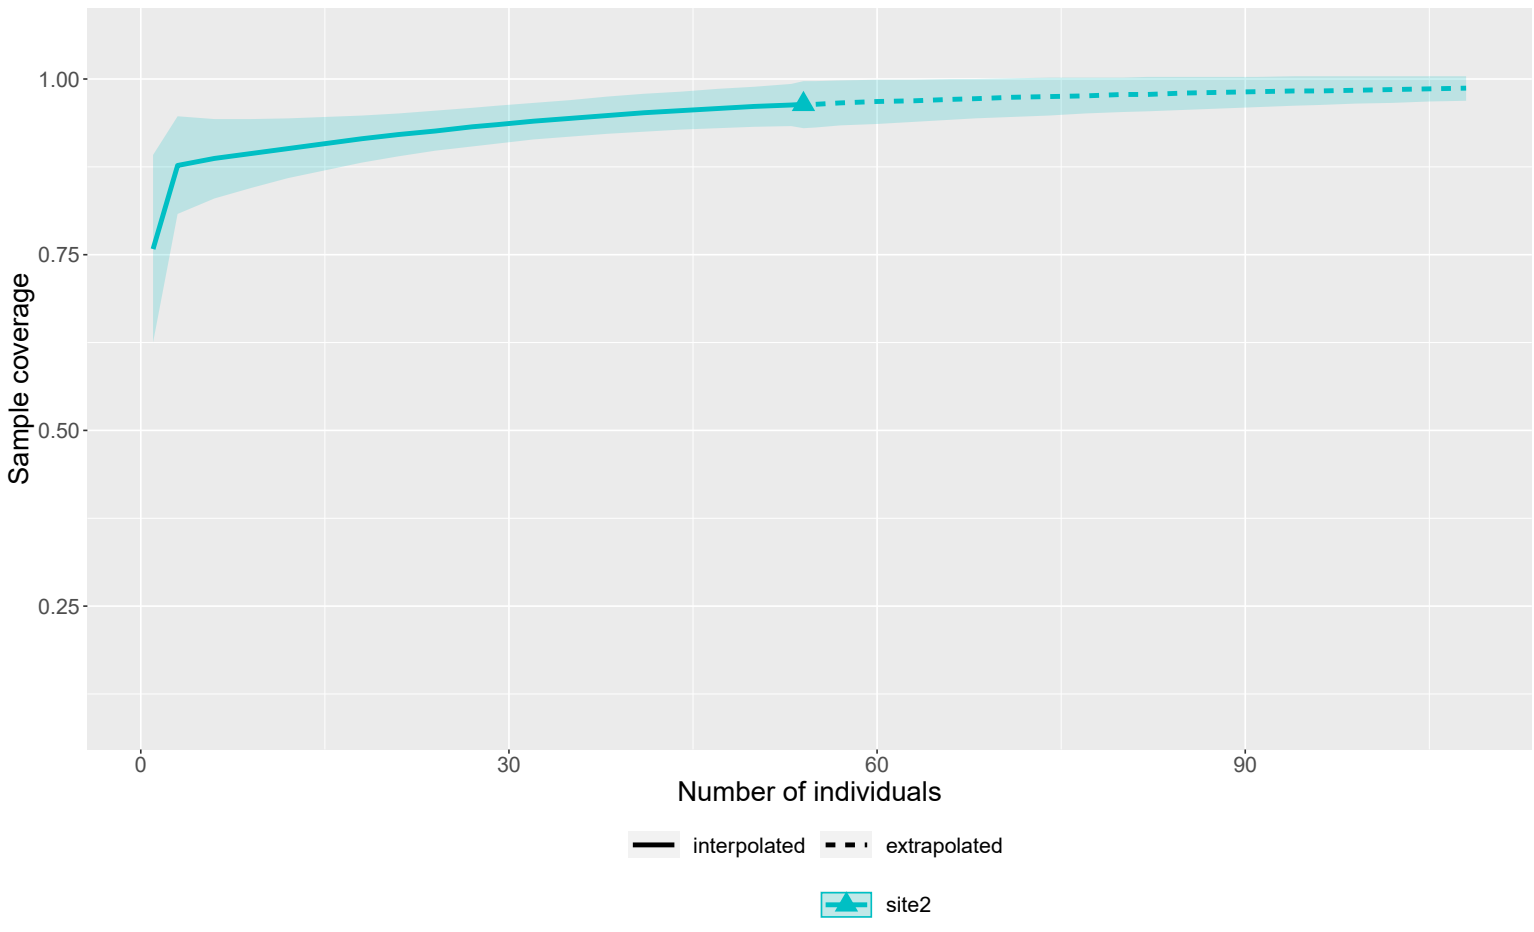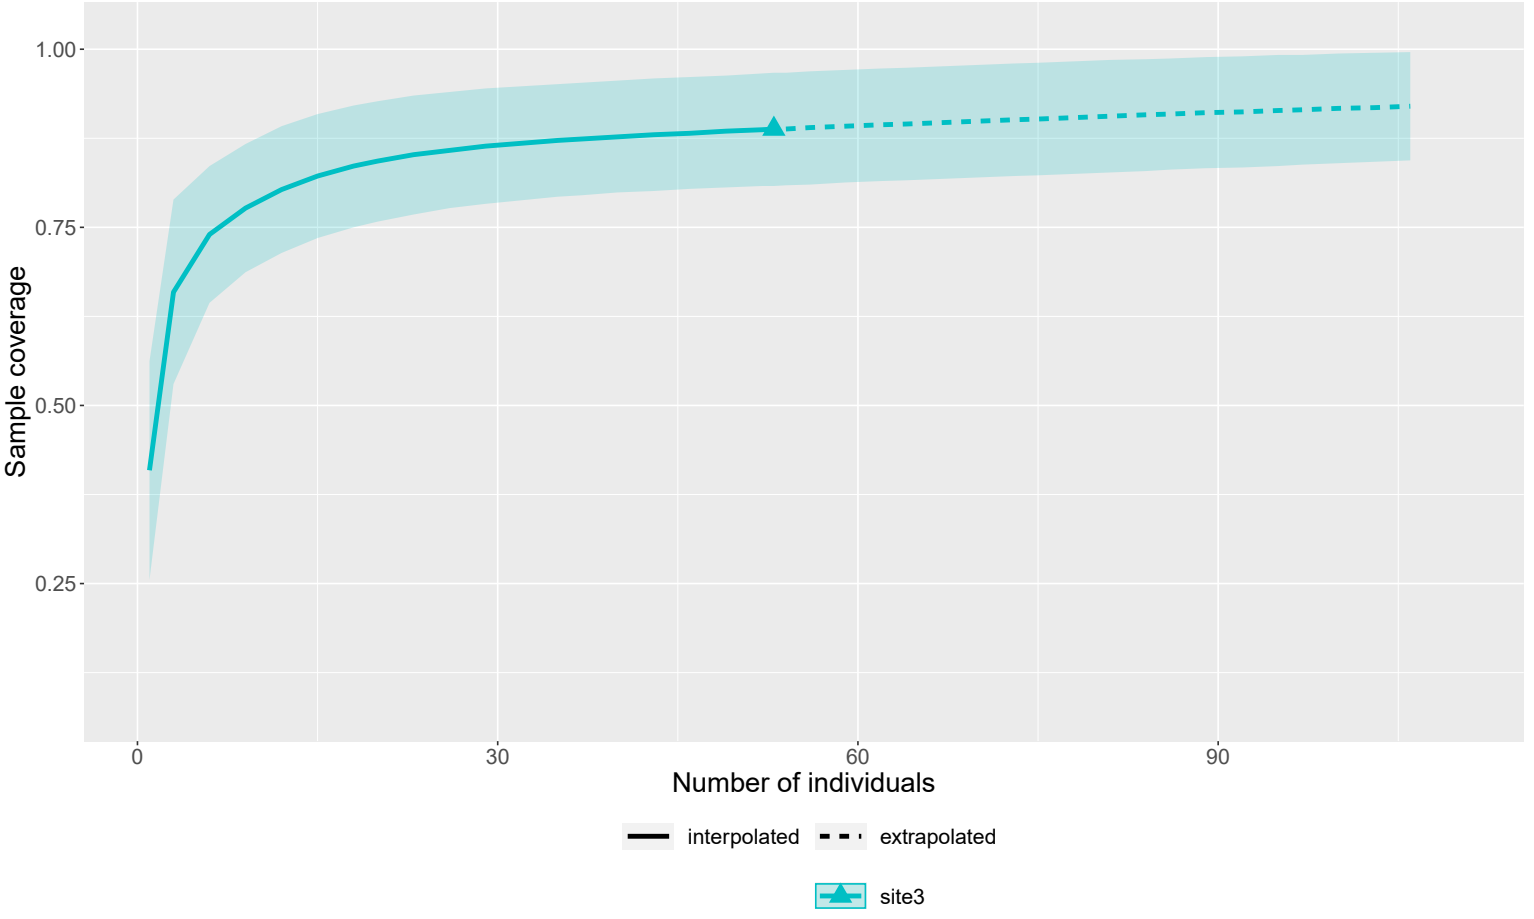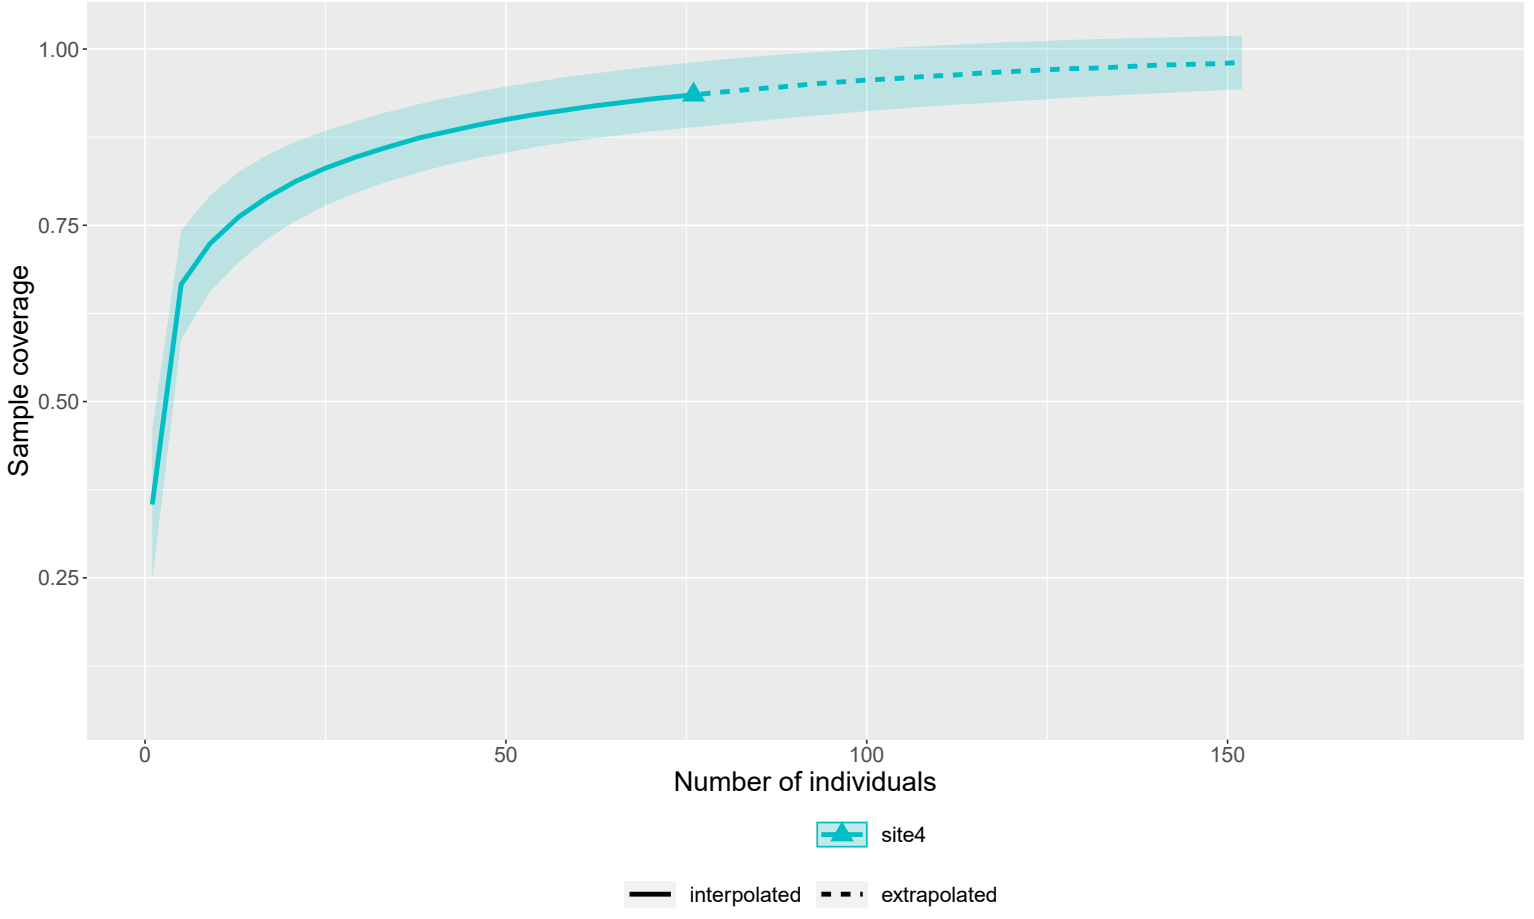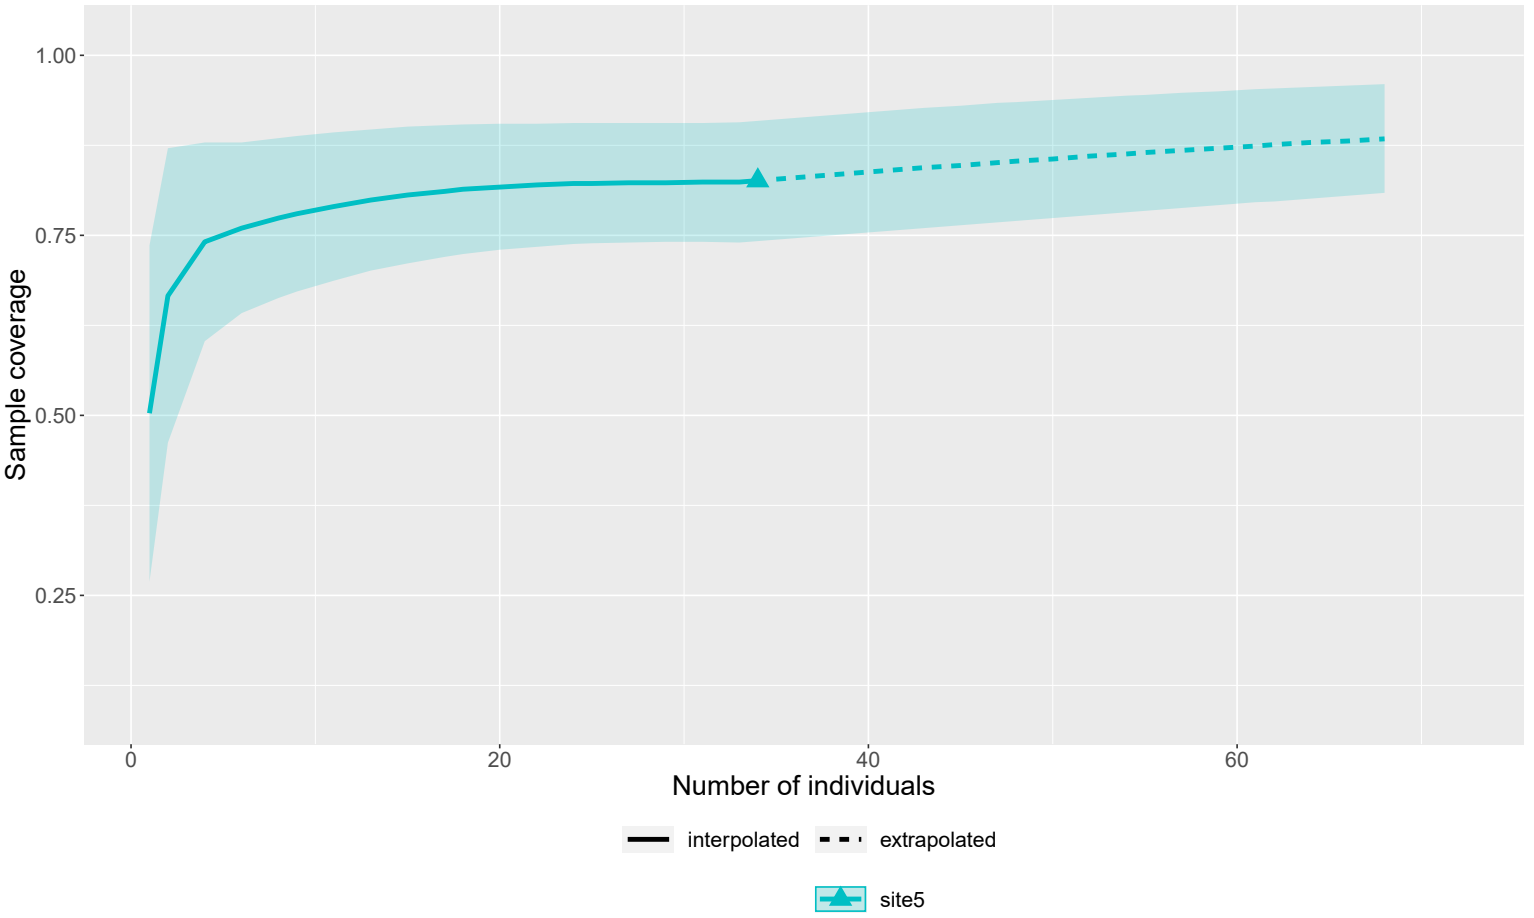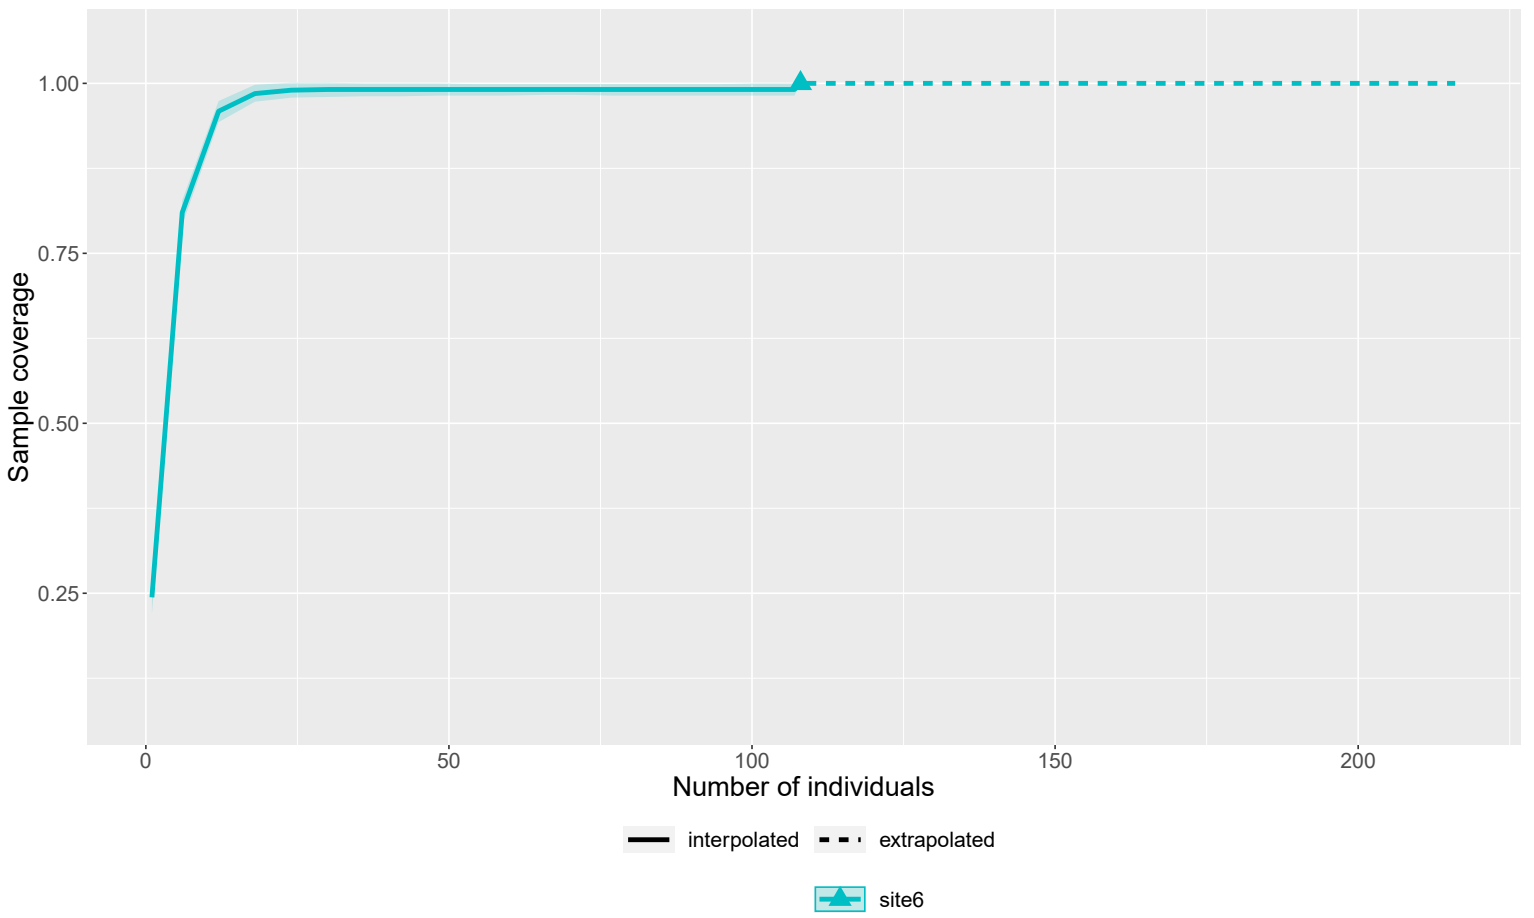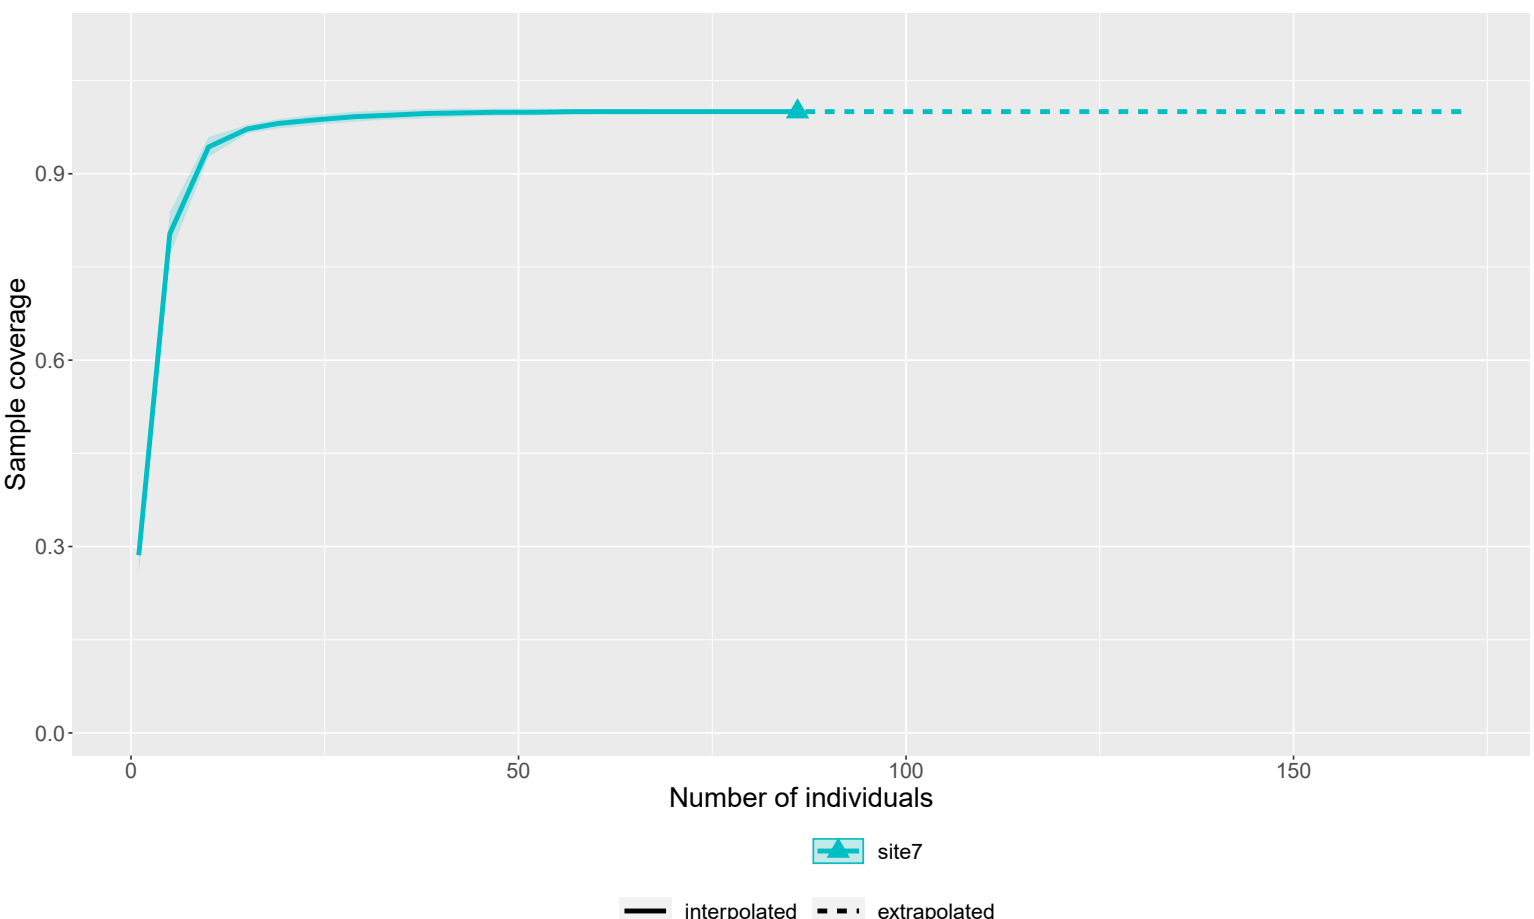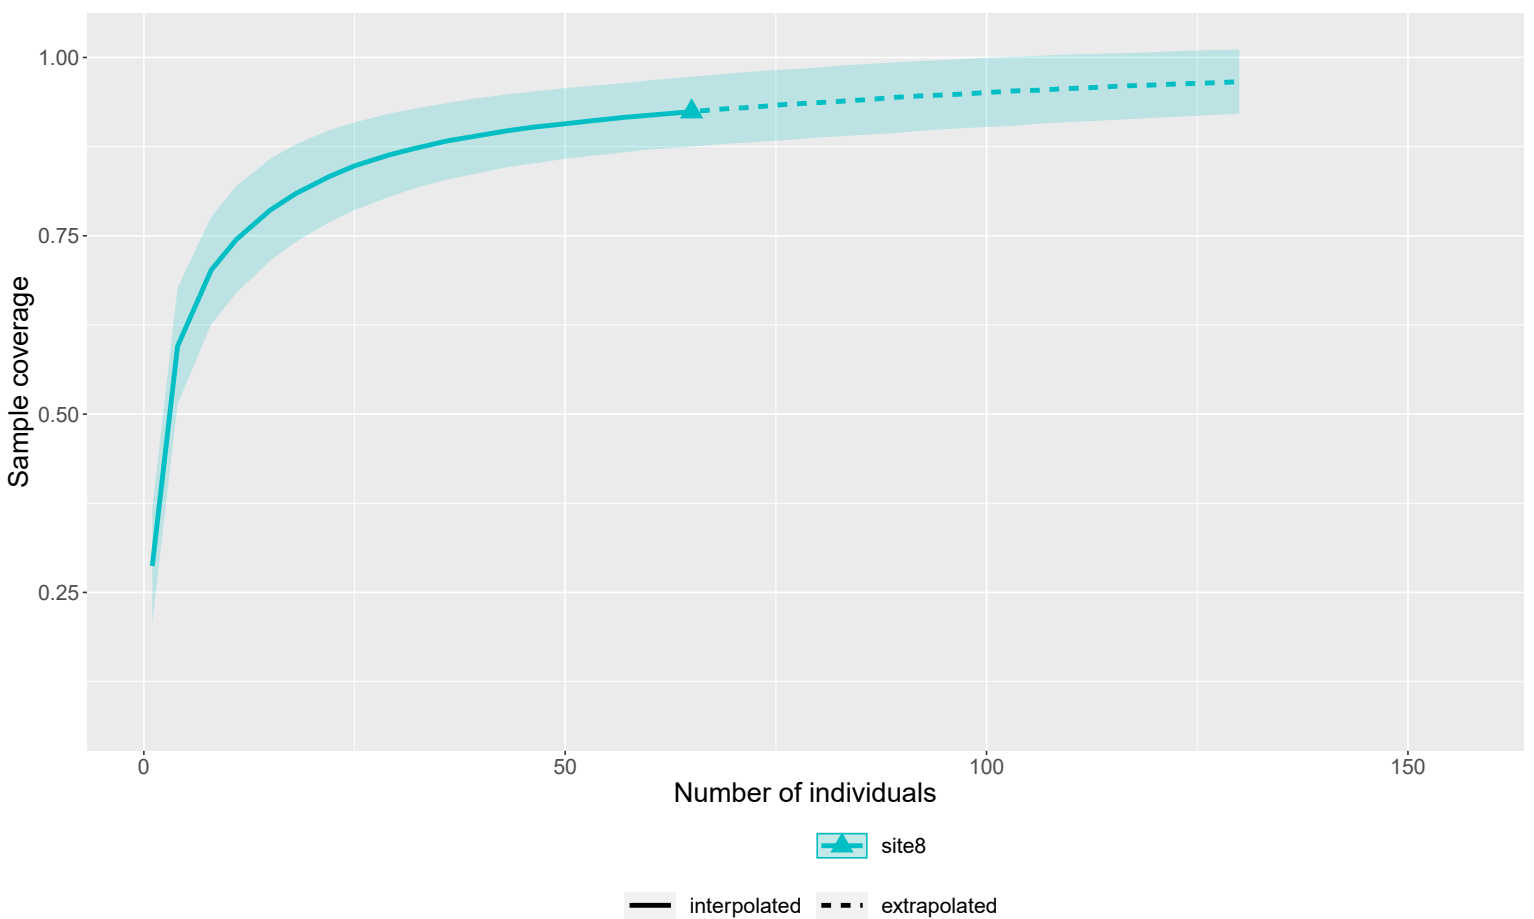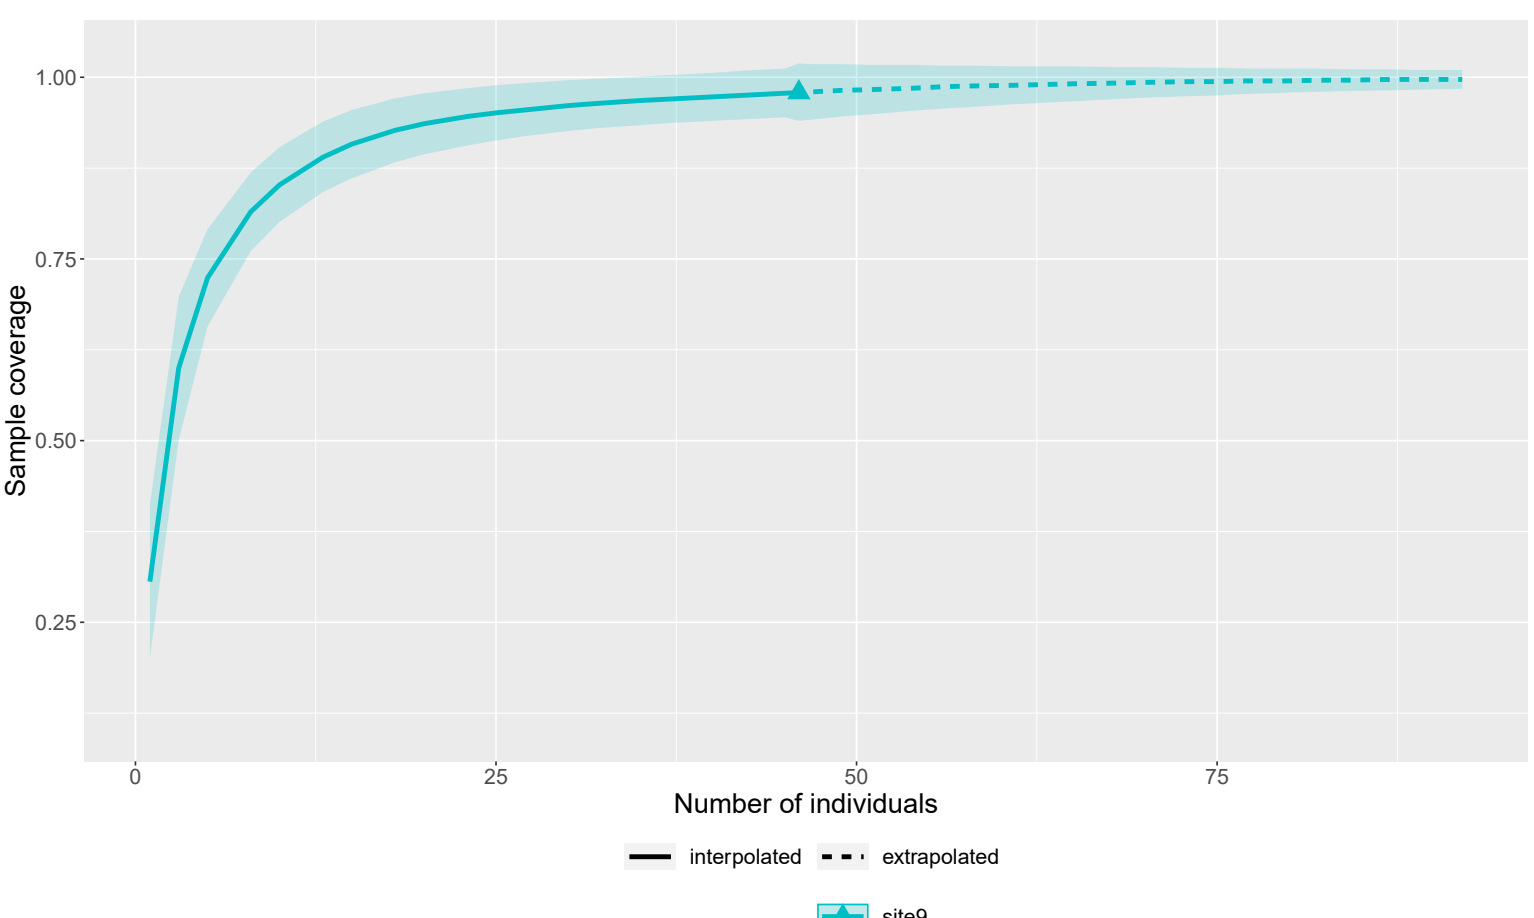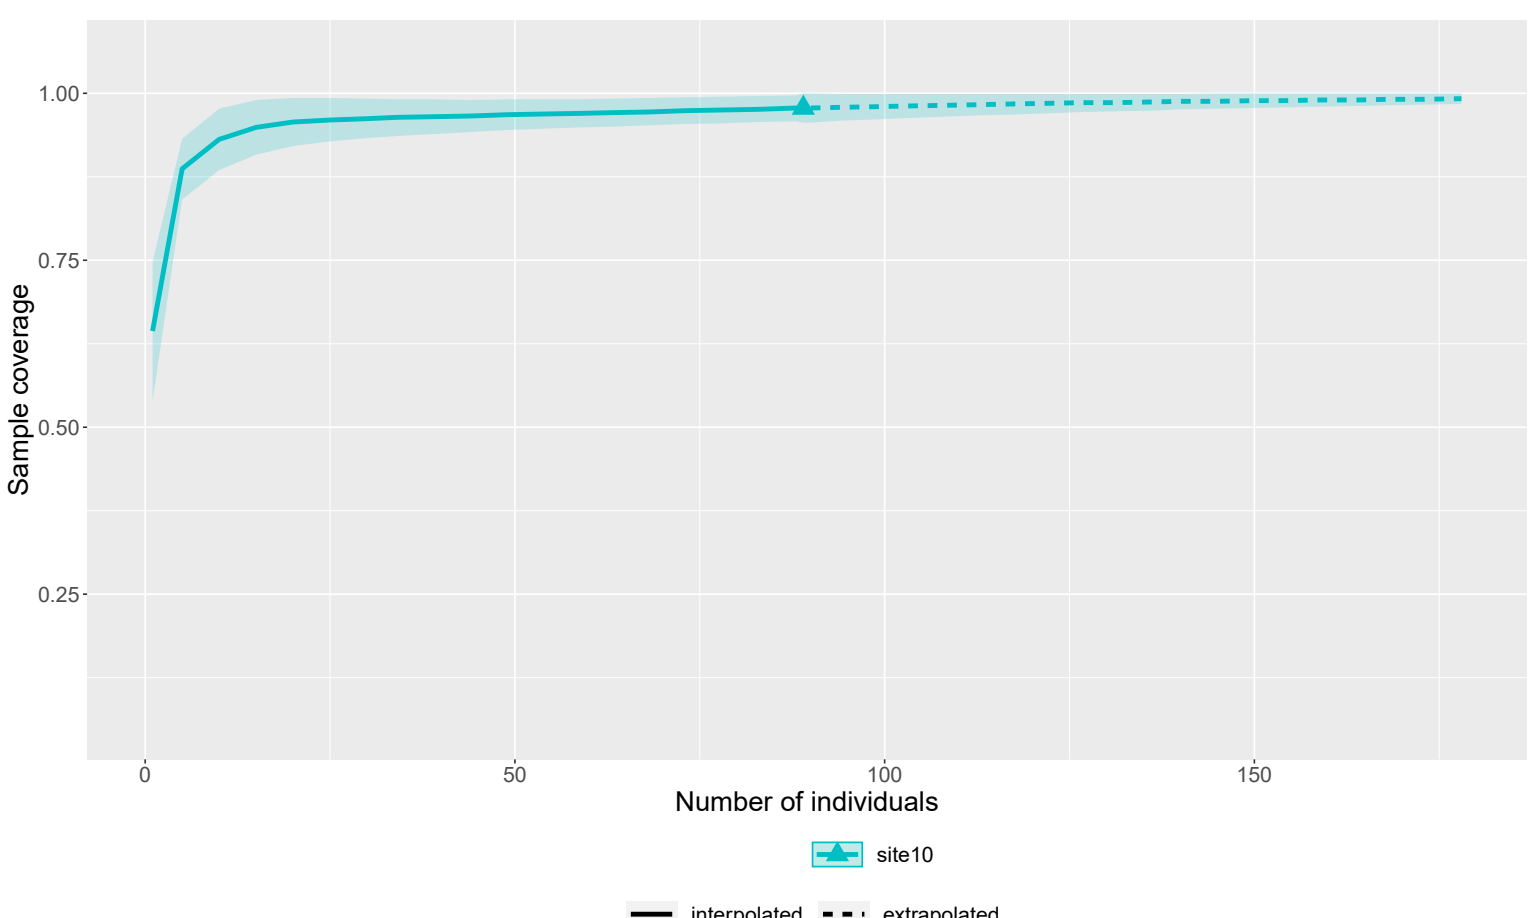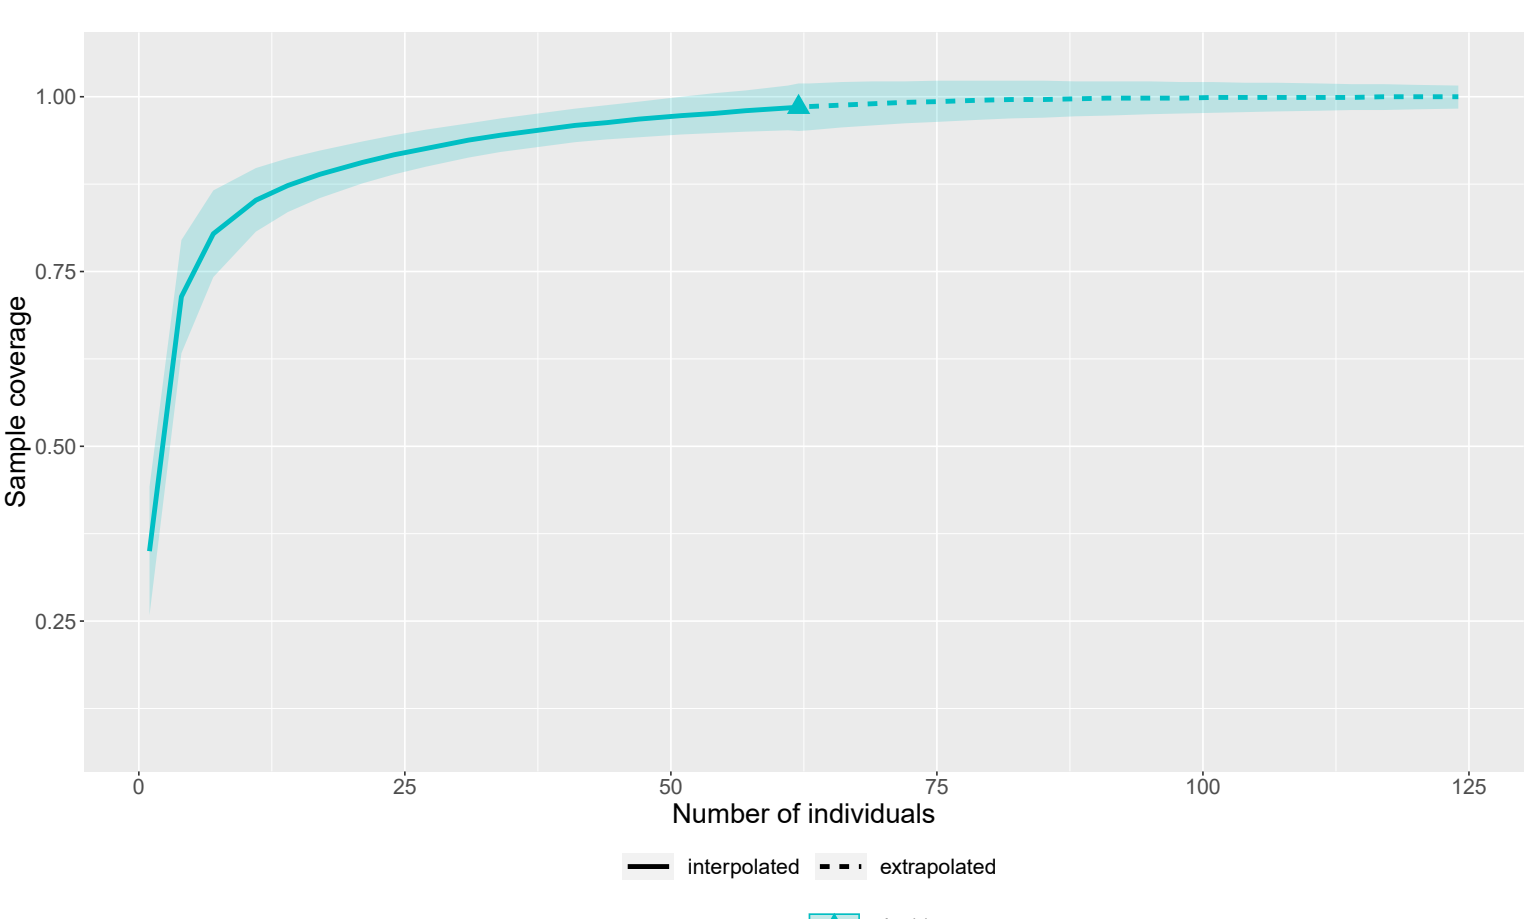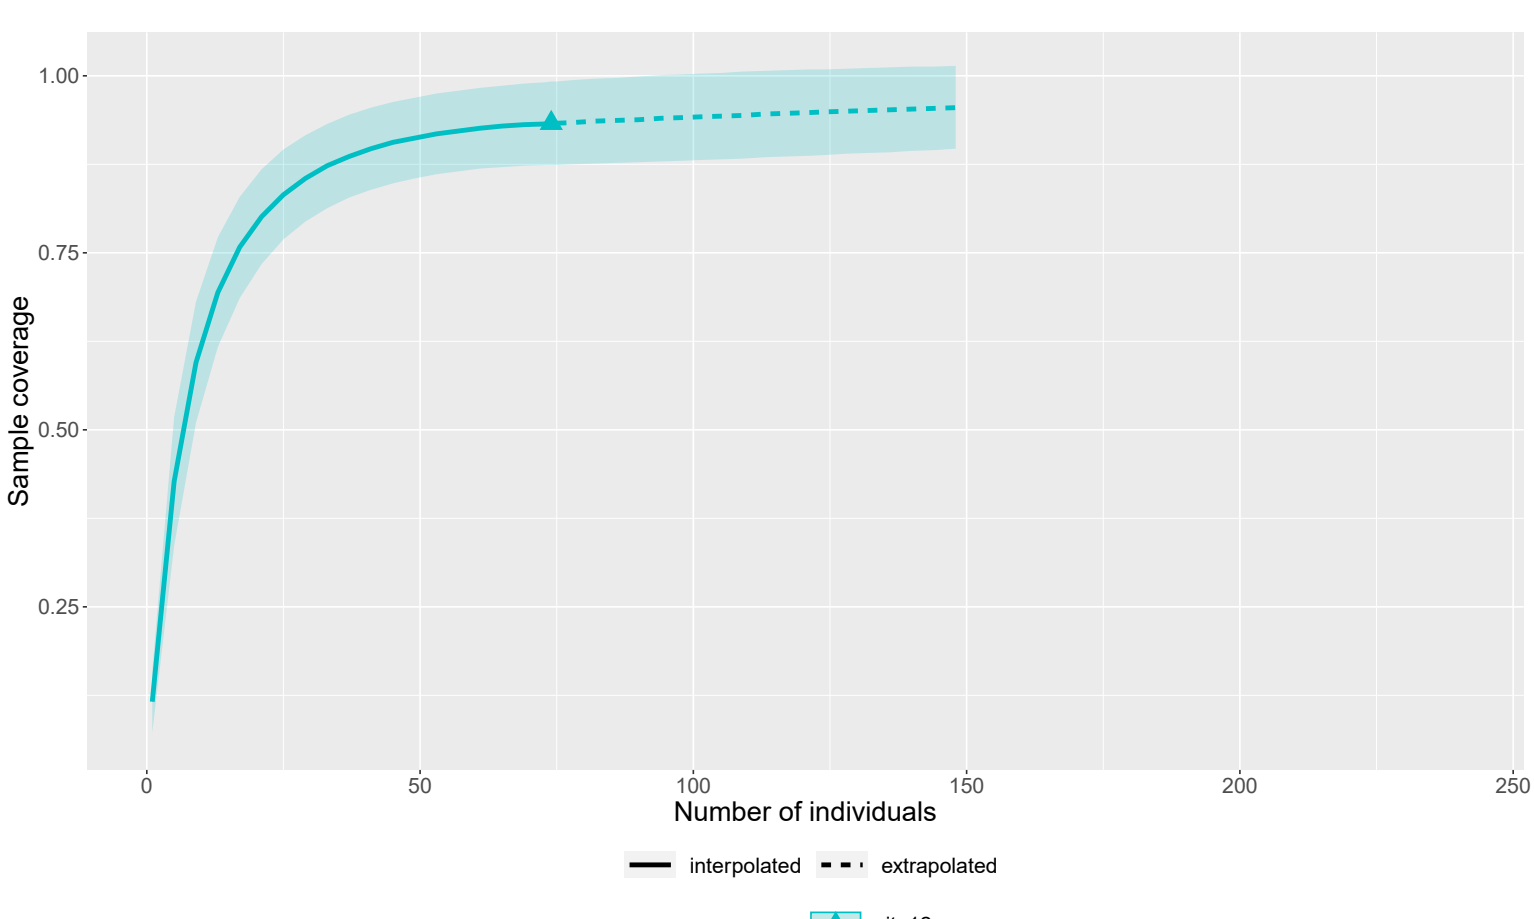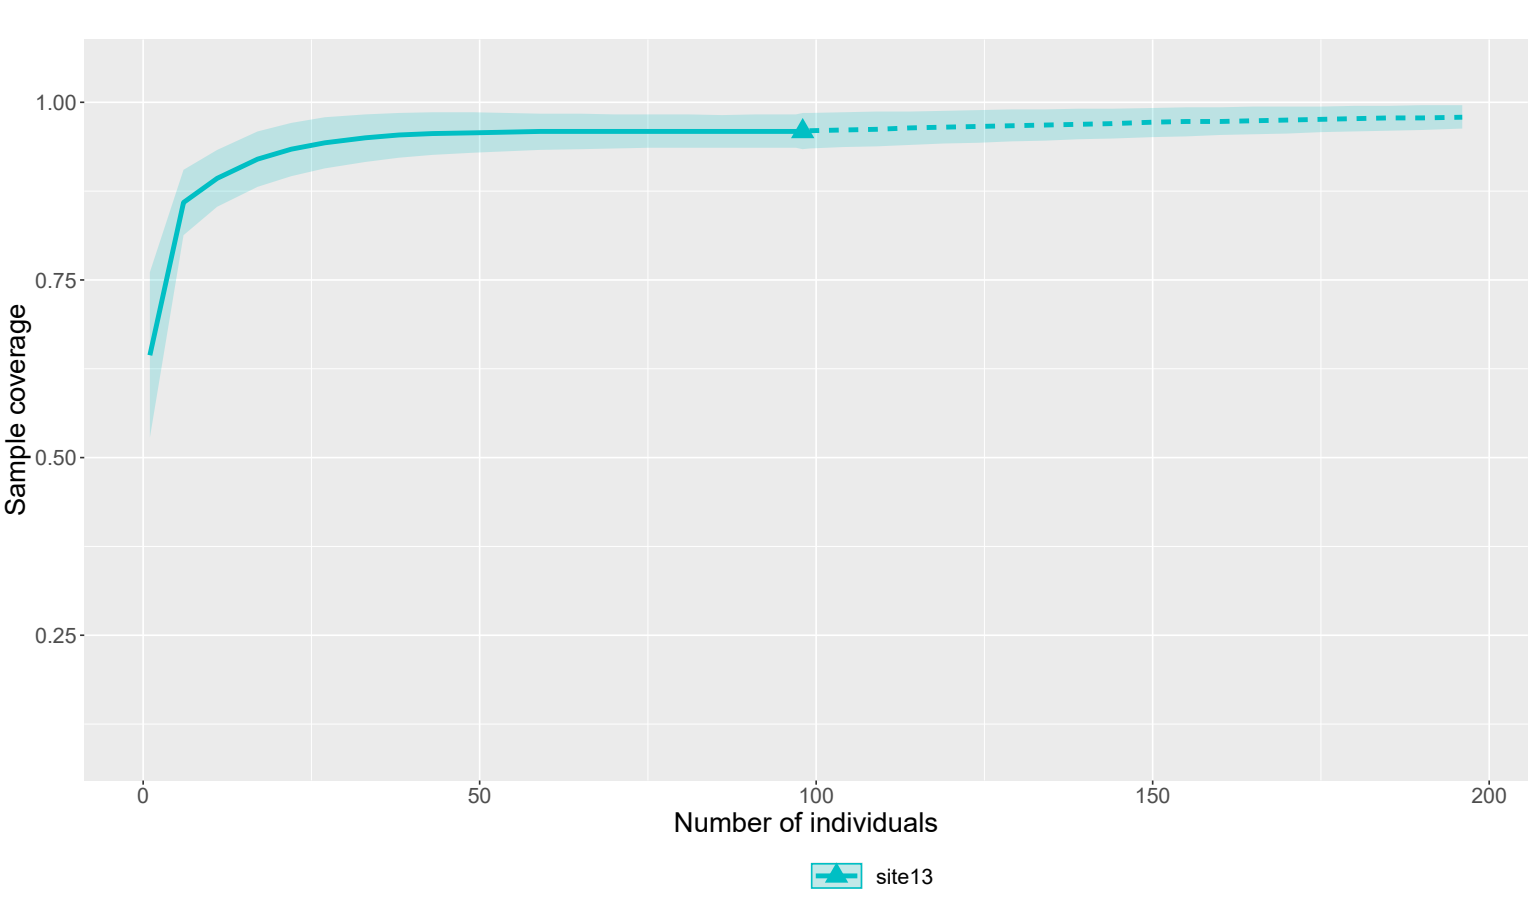

Supplement: s1 [file s1]
